# Supplementary material for: Characterisation of a transcriptome to find sequence differences between two differentially migrating subspecies of the willow warbler Phylloscopus trochilus
Source: PubMed Central journal article supplement (PMC3660185; doi:10.1186/1471-2164-14-330), 2013-05-14
Supplement: 1471-2164-14-330-S3.pdf [file 1471-2164-14-330-S3.pdf]

## Validation of highly differentiated SNPs

Subspecies alignments in BAM format were concatenated into a single BAM file using the `cat` function in Samtools [1]. From this alignment, a willow warbler consensus sequence spanning a few hundred bp around each SNP was copied from Samtools `tvview` and imported into Geneious 5.5.3 [2]. Within the same genomic intervals the corresponding zebra finch sequence was also retrieved. Primers (Additional file 3: Table S3) spanning the SNP were designed using Primer 3 [3] implemented in Geneious or manually if the algorithm could not detect any suitable pair. Eight samples representing each of the subspecies from Southern and Northern Sweden (Additional file 3: Table S4), respectively, were amplified using a touchdown PCR consisting of 12 cycles with 45 s of elongation and an initial annealing temperature of 63°C, which was decreasing with increments of 0.5° C/cycle, and followed by 27 cycles of 57°C annealing temperature and 45 s of elongation. PCRs were performed in reaction of 25 µl containing 1.5 mM MgCl<sub>2</sub>, 0.125 mM of each dNTP, 0.4 µM of primer, 0.5 units of Taq Polymerase (AmpliTaq®, Applied Biosystems, Branchburg, NJ, USA) and 10 ng of DNA template. Following quality checking on a 2 % agarose gel, PCR products were precipitated using 11 µl of Ammonium Acetate and 37.5 µl of 95 % ethanol. Sanger sequencing was performed using BigDye Terminator v.1.1 cycle sequencing kit (Applied Biosystems, Austin, TX, USA) on an ABI 3130 prism robot (Applied Biosystems, Foster City, CA, USA). The resulting sequencing files were visualized in Geneious and, following trimming of low-quality parts, aligned to the consensus 454-derived willow warbler sequence using MUSCLE [4] with a maximum of 10 iterations and manual adjustments if necessary. Heterozygous positions were scored manually. Sequences that are at least 200 bp long have been deposited in GenBank [GenBank: KC344860 - KC344958, KC517117-KC517140].

1. Li H, Handsaker B, Wysoker A, Fennell T, Ruan J, Homer N, Marth G, Abecasis G, Durbin R, Proc GPD: **The Sequence Alignment/Map format and SAMtools.** *Bioinformatics* 2009, **25**(16):2078-2079.
2. Drummond A, Ashton B, Buxton S, Cheung M, Cooper A, Duran C, Field M, Heled J, Kearse M, Markowitz S *et al*: **Geneious v5.4, Available from <http://www.geneious.com>**. 2011.
3. Rozen S, Skaletsky H: **Primer3 on the WWW for general users and for biologist programmers.** *Methods Mol Biol* 2000, **132**:365-386.
4. Edgar RC: **MUSCLE: multiple sequence alignment with high accuracy and high throughput.** *Nucleic Acids Res* 2004, **32**(5):1792-1797.

**Table S3 Primers used for validation**

| Gene              | Forward primer 5'-3'     | Reverse primer 5'-3'      | Amplicon size (bp) |
|-------------------|--------------------------|---------------------------|--------------------|
| ADCYAP1R1         | TGGCTCCAGCCAAGAGMAGA     | GCCGTSTAGMGCTCCCTT        | 493                |
| BAI3              | AAGTCACTGAACTATTCAGAGGCC | TACAGTCTGCAGTGAGCCAGG     | 215                |
| ESD               | ACTCTCCCTTCTCCCTCCC      | TGTTACCAGCTACACTGTGCCA    | 347                |
| FADS3             | CACCGAGCCTCTTCCTGCC      | AGCACCTTGCTGATTMTGTGGGA   | 516                |
| ENSTGUG0000005084 | AGCAATGCRGAGTCATTCAGCCT  | CCTGGGTGCGCATTACACYGT     | 565                |
| RB1               | AGAGCTTACAGTCAGTGACCC    | GCTGATCCTAGAGTACTTACAGTAG | 277                |
| RNF6              | ACCCAGAACTGGCTGCCGA      | GCCCATCCTTCGACTTGCCC      | 290                |
| RNMT              | TGCAGGCTTGAGCACAGCACA    | CAACCGTGAAACTTACATACTGGA  | 537                |
| SORD              | CAAGCGGATCAACGTCAAGCC    | CCGACTGTGCAAACCATCATCTCT  | 306                |
| XPOT              | CCGAACCAGCAAGGCTTTCAG    | TCAGAGGCAGAGGGAATGAACG    | 207                |

**Table S4 Samples used for validation**

| <b>Sample ID</b> | <b>Locality</b>             | <b>Coordinates</b>           |
|------------------|-----------------------------|------------------------------|
| 96A/05           | Stensoffa, Southern Sweden  | 55° 41' 42" N, 13° 26' 50" E |
| 96A/13           | Stensoffa, Southern Sweden  | 55° 41' 42" N, 13° 26' 50" E |
| 97A/03           | Haganäs, Southern Sweden    | 56° 15' 0" N, 14° 39' 60" E  |
| 97A/05           | Haganäs, Southern Sweden    | 56° 15' 0" N, 14° 39' 60" E  |
| 97B/01           | Växjö, Southern Sweden      | 56° 50' 0" N, 14° 43' 60" E  |
| 97B/10           | Växjö, Southern Sweden      | 56° 50' 0" N, 14° 43' 60" E  |
| 97E/05           | Tåkern, Southern Sweden     | 58° 19' 0" N, 14° 48' 60" E  |
| 97E/06           | Tåkern, Southern Sweden     | 58° 19' 0" N, 14° 48' 60" E  |
| 01K/01           | Tornehamn, Northern Sweden  | 68° 26' 0" N, 18° 34' 60" E  |
| 01K/02           | Tornehamn, Northern Sweden  | 68° 26' 0" N, 18° 34' 60" E  |
| 01L/19           | Stordalen, Northern Sweden  | 68° 19' 60" N, 19° 6' 0" E   |
| 01L/20           | Stordalen, Northern Sweden  | 68° 19' 60" N, 19° 6' 0" E   |
| 01M/05           | Kaisepakte, Northern Sweden | 68° 16' 60" N, 19° 18' 60" E |
| 01M/06           | Kaisepakte, Northern Sweden | 68° 16' 60" N, 19° 18' 60" E |
| 97N/13           | Gällivare, Northern Sweden  | 67° 13' 0" N, 20° 48' 0" E   |
| 97N/14           | Gällivare, Northern Sweden  | 67° 13' 0" N, 20° 48' 0" E   |
| 2D/02            | Voke, Lithuania             | 54° 35' 0" N, 25° 10' 0" E   |
| 2D/03            | Voke, Lithuania             | 54° 35' 0" N, 25° 10' 0" E   |
| 2D/05            | Voke, Lithuania             | 54° 35' 0" N, 25° 10' 0" E   |
| 2D/08            | Voke, Lithuania             | 54° 35' 0" N, 25° 10' 0" E   |
| 2D/09            | Voke, Lithuania             | 54° 35' 0" N, 25° 10' 0" E   |
| 2D/18            | Voke, Lithuania             | 54° 35' 0" N, 25° 10' 0" E   |
| 2D/19            | Voke, Lithuania             | 54° 35' 0" N, 25° 10' 0" E   |
| 2D/20            | Voke, Lithuania             | 54° 35' 0" N, 25° 10' 0" E   |
